# Supplementary material for: Preterm Birth Risk and Maternal Nativity, Ethnicity, and Race
Source: PubMed Central journal article supplement (PMC10958237; doi:10.1001/jamanetworkopen.2024.3194), 2024-03-21
Supplement: jamanetwopen-e243194-s001.pdf [file jamanetwopen-e243194-s001.pdf]

## Supplemental Online Content

Barreto A, Formanowski B, Peña MM, et al. Preterm birth risk and maternal nativity, ethnicity, and race. *JAMA Netw Open*. 2024;7(3):e243194.  
doi:10.1001/jamanetworkopen.2024.3194

**eFigure 1.** Flowchart of Participants Included in Analyses

**eFigure 2.** Categorization of Mutually Exclusive Nativity, Ethnicity, and Racial Analytic Groups

**eTable.** Unadjusted Relative Risk (RR) and Adjusted Relative Risk (aRR) of Preterm Birth Overall and by Gestational Categories Among Non-US-Born and US-Born Birthing People

This supplemental material has been provided by the authors to give readers additional information about their work.

# eFigure 1. Flow chart of participants included in analysis

Caption: <sup>a</sup>Births may have more than one missing variable

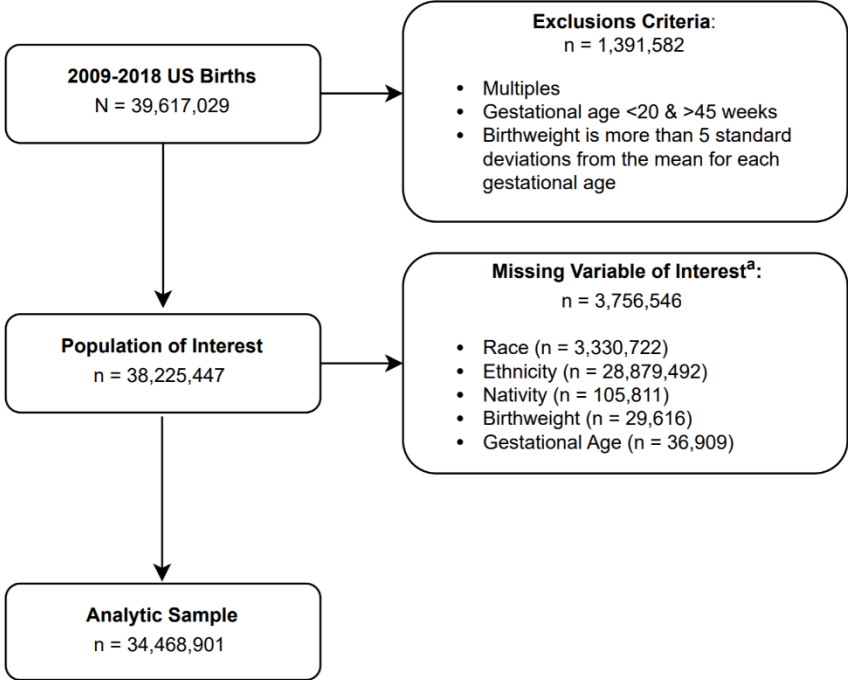

## eFigure 2. Categorization of Mutually Exclusive Nativity, Ethnicity, and Racial Analytic Groups

Caption: Birthing people were initially grouped into their composite nativity, ethnic, and racial groups. All Hispanics were grouped, regardless of race to create 14 analytic groups used in the primary analysis. Non-US-born American Indian or Alaskan birthing people were included in the non-US-born other race category for the gestational categories analysis due to small cell sizes, resulting in 13 analytic groups. <sup>a</sup>Included birthing people who selected other race or more than 1 race.

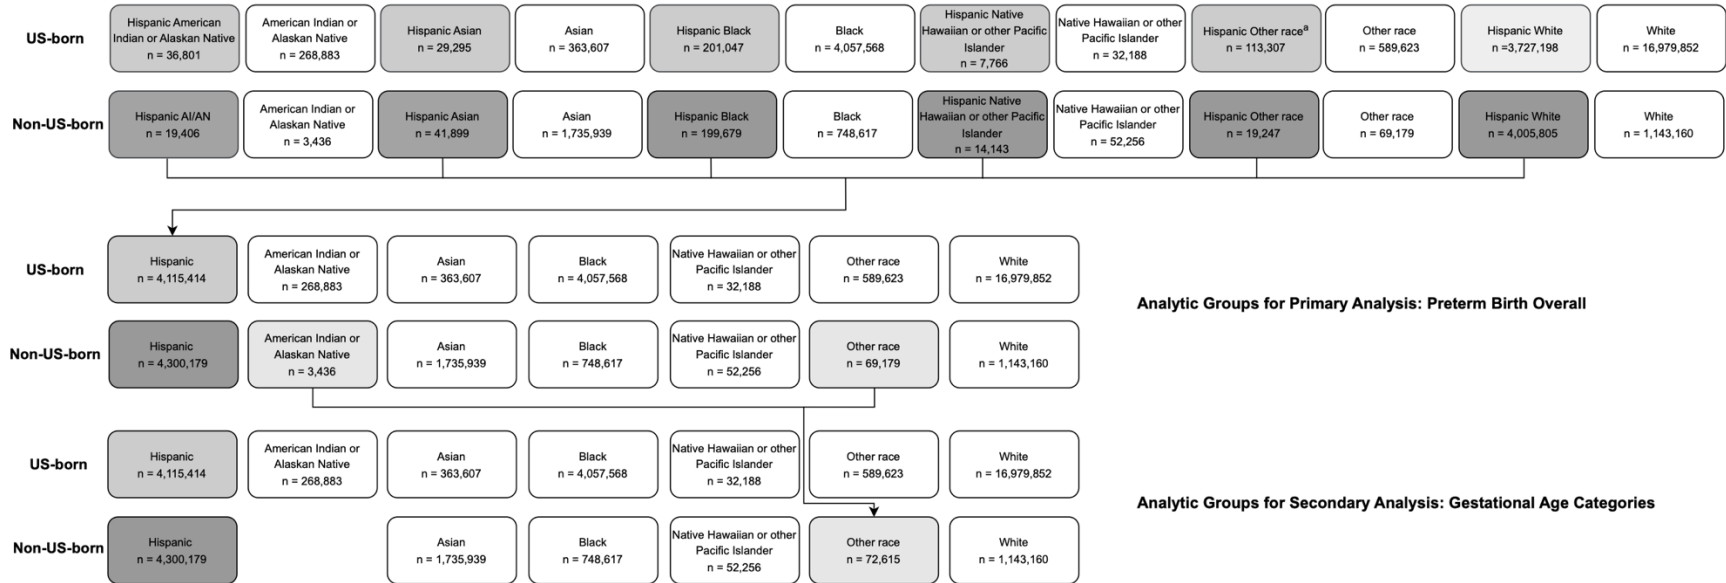

**eTable: Unadjusted Relative Risk (RR) and Adjusted Relative Risk (aRR) of Preterm Birth Overall and by Gestational Categories Among Non-US-Born and US-Born Birthing People**

|                              |                                                            | RR (95% CI)       | aRR (95% CI) <sup>a</sup> | aRR (95% CI) <sup>b</sup> |
|------------------------------|------------------------------------------------------------|-------------------|---------------------------|---------------------------|
| <b>Preterm<sup>c</sup></b>   | Non-US-born Hispanic                                       | 1.04 (1.04, 1.04) | 0.91 (0.91, 0.92)         | 0.98 (0.97, 0.98)         |
|                              | US-born Hispanic                                           | 1.17 (1.17, 1.17) | 1.11 (1.11, 1.12)         | 1.15 (1.14, 1.15)         |
|                              | Non-US-born American Indian or Alaskan Native              | 1.28 (1.15, 1.42) | 1.20 (1.08, 1.33)         | 1.19 (1.07, 1.32)         |
|                              | US-born American Indian or Alaskan Native                  | 1.33 (1.32, 1.35) | 1.21 (1.19, 1.22)         | 1.15 (1.13, 1.16)         |
|                              | Non-US-born Asian                                          | 1.13 (1.12, 1.14) | 1.25 (1.23, 1.26)         | 1.27 (1.26, 1.28)         |
|                              | US-born Asian                                              | 0.94 (0.94, 0.95) | 1.01 (1.00, 1.01)         | 1.06 (1.06, 1.07)         |
|                              | Non-US-born Black                                          | 1.14 (1.13, 1.15) | 1.04 (1.03, 1.05)         | 1.09 (1.08, 1.09)         |
|                              | US-born Black                                              | 1.69 (1.69, 1.70) | 1.48 (1.47, 1.48)         | 1.44 (1.44, 1.45)         |
|                              | Non-US-born Native Hawaiian or Other Pacific Islander      | 1.37 (1.33, 1.41) | 1.20 (1.16, 1.23)         | 1.22 (1.19, 1.26)         |
|                              | US-born Native Hawaiian or Other Pacific Islander          | 1.21 (1.17, 1.26) | 1.16 (1.12, 1.20)         | 1.14 (1.10, 1.18)         |
|                              | Non-US-born other race <sup>g</sup>                        | 1.02 (0.99, 1.05) | 1.01 (0.98, 1.04)         | 1.05 (1.02, 1.08)         |
|                              | US-born other race                                         | 1.19 (1.18, 1.20) | 1.14 (1.13, 1.15)         | 1.13 (1.12, 1.14)         |
|                              | Non-US-born White                                          | 0.77 (0.77, 0.78) | 0.79 (0.78, 0.79)         | 0.85 (0.84, 0.86)         |
|                              | US-born White                                              | 1 [Reference]     | 1 [Reference]             | 1 [Reference]             |
| <b>Extremely<sup>d</sup></b> | Non-US-born Hispanic                                       | 1.24 (1.23, 1.26) | 1.07 (1.05, 1.09)         | 1.21 (1.19, 1.23)         |
|                              | US-born Hispanic                                           | 1.49 (1.47, 1.51) | 1.41 (1.39, 1.43)         | 1.50 (1.47, 1.52)         |
|                              | Non-US-born American Indian or Alaskan Native <sup>h</sup> | -                 | -                         | -                         |
|                              | US-born American Indian or Alaskan Native                  | 1.49 (1.42, 1.57) | 1.30 (1.24, 1.36)         | 1.25 (1.19, 1.32)         |
|                              | Non-US-born Asian                                          | 0.94 (0.92, 0.96) | 1.04 (1.02, 1.07)         | 1.17 (1.14, 1.20)         |
|                              | US-born Asian                                              | 1.17 (1.12, 1.23) | 1.36 (1.31, 1.43)         | 1.44 (1.38, 1.51)         |
|                              | Non-US-born Black                                          | 2.5 (2.44, 2.55)  | 2.13 (2.08, 2.18)         | 2.31 (2.25, 2.36)         |
|                              | US-born Black                                              | 3.72 (3.68, 3.76) | 3.02 (2.99, 3.06)         | 3.02 (2.99, 3.06)         |
|                              | Non-US-born Native Hawaiian or Other Pacific Islander      | 1.52 (1.36, 1.69) | 1.21 (1.08, 1.34)         | 1.29 (1.15, 1.43)         |
|                              | US-born Native Hawaiian or Other Pacific Islander          | 1.69 (1.48, 1.92) | 1.58 (1.38, 1.79)         | 1.61 (1.41, 1.83)         |
|                              | Non-US-born other race                                     | 1.21 (1.10, 1.35) | 1.19 (1.07, 1.30)         | 1.27 (1.15, 1.41)         |
|                              | US-born other race                                         | 1.64 (1.59, 1.69) | 1.55 (1.50, 1.60)         | 1.53 (1.48, 1.58)         |
|                              | Non-US-born White                                          | 0.78 (0.76, 0.81) | 0.79 (0.77, 0.82)         | 0.88 (0.85, 0.91)         |
|                              | US-born White                                              | 1 [Reference]     | 1 [Reference]             | 1 [Reference]             |
|                              | Non-US-born Hispanic                                       | 1.09 (1.08, 1.10) | 0.91 (0.90, 0.92)         | 1.01 (0.996, 1.02)        |
|                              | US-born Hispanic                                           | 1.24 (1.22, 1.25) | 1.16 (1.15, 1.17)         | 1.22 (1.21, 1.23)         |

|                                                       |                                                       |                   |                   |                   |
|-------------------------------------------------------|-------------------------------------------------------|-------------------|-------------------|-------------------|
| <b>Moderately<sup>e</sup></b>                         | Non-US-born American Indian or Alaskan Native         | -                 | -                 | -                 |
|                                                       | US-born American Indian or Alaskan Native             | 1.45 (1.41, 1.50) | 1.30 (1.26, 1.34) | 1.22 (1.18, 1.25) |
|                                                       | Non-US-born Asian                                     | 0.93 (0.92, 0.94) | 1.00 (0.98, 1.01) | 1.10 (1.08, 1.12) |
|                                                       | US-born Asian                                         | 1.15 (1.12, 1.19) | 1.30 (1.26, 1.34) | 1.36 (1.32, 1.39) |
|                                                       | Non-US-born Black                                     | 1.43 (1.41, 1.45) | 1.24 (1.22, 1.26) | 1.32 (1.29, 1.34) |
|                                                       | US-born Black                                         | 2.22 (2.20, 2.24) | 1.87 (1.85, 1.88) | 1.81 (1.80, 1.83) |
|                                                       | Non-US-born Native Hawaiian or Other Pacific Islander | 1.52 (1.43, 1.62) | 1.27 (1.19, 1.36) | 1.33 (1.25, 1.43) |
|                                                       | US-born Native Hawaiian or Other Pacific Islander     | 1.31 (1.20, 1.43) | 1.24 (1.14, 1.35) | 1.22 (1.12, 1.34) |
|                                                       | Non-US-born other race                                | 1.16 (1.09, 1.23) | 1.12 (1.06, 1.20) | 1.20 (1.13, 1.28) |
|                                                       | US-born other race                                    | 1.30 (1.27, 1.32) | 1.24 (1.21, 1.26) | 1.22 (1.20, 1.25) |
| <b>Late<sup>f</sup></b>                               | Non-US-born White                                     | 0.75 (0.73, 0.76) | 0.75 (0.73, 0.76) | 0.84 (0.82, 0.85) |
|                                                       | US-born White                                         | 1 [Reference]     | 1 [Reference]     | 1 [Reference]     |
|                                                       | Non-US-born Hispanic                                  | 1.02 (1.01, 1.02) | 0.89 (0.88, 0.89) | 0.95 (0.94, 0.95) |
|                                                       | US-born Hispanic                                      | 1.15 (1.15, 1.16) | 1.09 (1.08, 1.10) | 1.13 (1.12, 1.14) |
|                                                       | Non-US-born American Indian or Alaskan Native         | -                 | -                 | -                 |
|                                                       | US-born American Indian or Alaskan Native             | 1.34 (1.32, 1.36) | 1.21 (1.19, 1.23) | 1.15 (1.13, 1.17) |
|                                                       | Non-US-born Asian                                     | 0.94 (0.93, 0.95) | 1.01 (1.00, 1.02) | 1.05 (1.05, 1.06) |
|                                                       | US-born Asian                                         | 1.14 (1.12, 1.15) | 1.26 (1.24, 1.27) | 1.28 (1.26, 1.30) |
|                                                       | Non-US-born Black                                     | 1.54 (1.53, 1.55) | 1.35 (1.34, 1.36) | 1.34 (1.33, 1.34) |
|                                                       | US-born Black                                         | 0.98 (0.97, 1.00) | 0.91 (0.9, 0.92)  | 0.95 (0.94, 0.96) |
| Non-US-born Native Hawaiian or Other Pacific Islander | 1.38 (1.33, 1.42)                                     | 1.21 (1.17, 1.25) | 1.23 (1.19, 1.28) |                   |
| US-born Native Hawaiian or Other Pacific Islander     | 1.18 (1.13, 1.23)                                     | 1.13 (1.08, 1.18) | 1.11 (1.06, 1.16) |                   |
| Non-US-born other race                                | 0.99 (0.96, 1.03)                                     | 0.98 (0.95, 1.02) | 1.02 (0.98, 1.05) |                   |
| US-born other race                                    | 1.15 (1.13, 1.16)                                     | 1.11 (1.10, 1.12) | 1.10 (1.08, 1.11) |                   |
| Non-US-born White                                     | 0.76 (0.75, 0.77)                                     | 0.78 (0.77, 0.79) | 0.84 (0.83, 0.84) |                   |
| US-born White                                         | 1 [Reference]                                         | 1 [Reference]     | 1 [Reference]     |                   |

<sup>a</sup>Models adjusted for maternal age, educational level, insurance type, prenatal care, presence of congenital anomalies in newborn, birth year, and state of birth.

<sup>b</sup>Models adjusted for maternal age, educational level, insurance type, prenatal care, tobacco use, hypertension, diabetes, presence of congenital anomalies in newborn, birth year, and state of birth.

<sup>c</sup><37 weeks' gestation

<sup>d</sup><29 weeks' gestation

<sup>e</sup>29-33 weeks' gestation

<sup>f</sup>34-36 weeks' gestation

<sup>g</sup>Includes birthing people who selected other race or more than 1 race.

<sup>h</sup>Non-US-born American Indian or Alaskan Native subgroup (N=3,436) were included in the non-US-born other race category for the preterm severity analyses due to small cell sizes.
