# Supplementary material for: Preterm Birth Risk and Maternal Nativity, Ethnicity, and Race
Source: PubMed Central journal article supplement (PMC10958237; doi:10.1001/jamanetworkopen.2024.3194), 2024-03-21
Supplement: jamanetwopen-e243194-s002.pdf [file jamanetwopen-e243194-s002.pdf]

## Data Sharing Statement

Barreto. Preterm Birth Risk and Maternal Nativity, Ethnicity, and Race. *JAMA Netw Open*.  
Published March 21, 2024. doi:10.1001/jamanetworkopen.2024.3194

### Data

**Data available:** No

### Additional Information

**Explanation for why data not available:** This study examined restricted used data from the National Vital Statistics Office and thus data must be requested from them through a Data Use Agreement. For more information about analytic code and data definitions, please email the corresponding author.
